# Supplementary material for: Comprehensive in-vivo secondary structure of the SARS-CoV-2 genome reveals novel regulatory motifs and mechanisms
Source: bioRxiv or medRxiv preprint supplement (doi:10.1101/2020.07.10.197079), 2020-07-10
Supplement: Supplementary file [file media-1.pdf]

**Table S1.** Well-determined region in Orf1ab region

| Region | Window | Start | End   | Size | Protein Domain | Median Shannon Entropy |
|--------|--------|-------|-------|------|----------------|------------------------|
| 1      | 1      | 1     | 622   | 622  | 5'UTR, Nsp1    | 7.69E-05               |
| 2      | 1      | 944   | 1026  | 83   | Nsp2           | 1.75E-06               |
| 3      | 1      | 1478  | 1572  | 95   | Nsp2           | 2.62E-02               |
| 4      | 1      | 1968  | 2188  | 221  | Nsp2           | 5.07E-04               |
| 5      | 1      | 2682  | 2800  | 119  | Nsp3           | 9.19E-03               |
| 6      | 1      | 3416  | 3597  | 182  | Nsp3           | 5.24E-05               |
| 7      | 1      | 4169  | 4232  | 64   | Nsp3           | 3.01E-06               |
| 8      | 1      | 4471  | 4713  | 243  | Nsp3           | 4.82E-04               |
| 9      | 1      | 4791  | 5162  | 372  | Nsp3           | 4.55E-04               |
| 10     | 1      | 5693  | 6013  | 321  | Nsp3           | 2.07E-03               |
| 11     | 1      | 6116  | 6549  | 434  | Nsp3           | 4.24E-04               |
| 12     | 1      | 6786  | 6887  | 102  | Nsp3           | 4.88E-03               |
| 13     | 1      | 7025  | 7072  | 48   | Nsp3           | 1.06E-03               |
| 14     | 2      | 7413  | 7518  | 106  | Nsp3           | 1.55E-04               |
| 15     | 2      | 7717  | 8230  | 514  | Nsp3           | 1.29E-03               |
| 16     | 2      | 8350  | 8512  | 163  | Nsp3           | 4.90E-04               |
| 17     | 2      | 8702  | 8789  | 88   | Nsp4           | 6.45E-04               |
| 18     | 2      | 9295  | 9398  | 104  | Nsp4           | 2.76E-02               |
| 19     | 2      | 9612  | 9886  | 275  | Nsp4           | 1.70E-02               |
| 20     | 2      | 10129 | 10312 | 184  | Nsp5           | 3.00E-04               |
| 21     | 2      | 10630 | 10687 | 58   | Nsp5           | 3.53E-04               |
| 22     | 2      | 10798 | 11039 | 242  | Nsp5, Nsp6     | 7.67E-04               |
| 23     | 2      | 11221 | 11470 | 250  | Nsp6           | 2.34E-03               |
| 24     | 2      | 11552 | 11908 | 357  | Nsp6, Nsp7     | 2.09E-03               |
| 25     | 2      | 12230 | 12686 | 457  | Nsp8           | 1.86E-03               |
| 26     | 2      | 12895 | 13030 | 136  | Nsp9           | 1.55E-02               |
| 27     | 2      | 13594 | 13920 | 327  | Nsp12          | 7.39E-04               |
| 28     | 2      | 13993 | 14230 | 238  | Nsp12          | 1.19E-02               |
| 29     | 3      | 14444 | 14532 | 89   | Nsp12          | 4.27E-04               |
| 30     | 3      | 14557 | 14641 | 85   | Nsp12          | 1.05E-05               |
| 31     | 3      | 14973 | 15136 | 164  | Nsp12          | 9.07E-04               |
| 32     | 3      | 15510 | 15608 | 99   | Nsp12          | 1.59E-04               |
| 33     | 3      | 15767 | 16005 | 239  | Nsp12          | 4.29E-04               |
| 34     | 3      | 16114 | 16260 | 147  | Nsp12          | 2.69E-03               |
| 35     | 3      | 17580 | 17677 | 98   | Nsp13          | 1.64E-04               |
| 36     | 3      | 17854 | 17938 | 85   | Nsp13          | 6.09E-04               |
| 37     | 3      | 19373 | 19550 | 178  | Nsp14          | 1.52E-02               |
| 38     | 3      | 19665 | 19735 | 71   | Nsp15          | 2.32E-05               |
| 39     | 3      | 20248 | 20408 | 161  | Nsp15          | 7.72E-03               |
| 40     | 3      | 20668 | 20792 | 125  | Nsp16          | 4.91E-06               |

**Table S2.** Gene-specific RT primers

| <b>Primer Name</b> | <b>Sequence</b>      |
|--------------------|----------------------|
| RT_SC2_Amplicon_1  | TTTTTTTTTGTTCATTCTCC |
| RT_SC2_Amplicon_2  | ATGTTGAGTACATGACTGT  |
| RT_SC2_Amplicon_3  | TAACATGTTCAACACCAGT  |
| RT_SC2_Amplicon_4  | AATCATTTTCATCTGTGAGC |
| RT_SC2_Amplicon_5  | TAATACCTATTGGCAAATC  |
| RT_SC2_Amplicon_6  | AACCACCTAACTGACTATG  |
| RT_SC2_Amplicon_7  | TAACTCTGGAAAATCTGT   |
| RT_SC2_Amplicon_8  | TAACATTATCGCTACCAAC  |
| RT_SC2_Amplicon_9  | TTAGTAAGTGCAGCTACTG  |
| RT_SC2_Amplicon_10 | AAGCAGTTTGTGTAGTACC  |
| RT_SC2_Amplicon_11 | TATCTAAAACGGCAATTCC  |
| RT_SC2_Amplicon_12 | TACCAACTGCACTAAAAAC  |
| RT_SC2_Amplicon_13 | AATTAGACATTAAAACACC  |
| RT_SC2_Amplicon_14 | AAACATAAAATGTTTTACC  |
| RT_SC2_Amplicon_15 | TTTGTTGACTATCATCATC  |
| RT_SC2_Amplicon_16 | TTAGTCAAATTCTCAGTGC  |

**Table S3.** Gene-specific PCR Primers

|                       |                               |
|-----------------------|-------------------------------|
| R_PCR_SC2_Amplicon_1  | TTTTTTGTCATTCTCCTAAGAAG       |
| R_PCR_SC2_Amplicon_2  | TTGAGTACATGACTGTAAACTACAT     |
| R_PCR_SC2_Amplicon_3  | CATGTTCAACACCAGTGTCTGTA       |
| R_PCR_SC2_Amplicon_4  | CATTTTCATCTGTGAGCAAAG         |
| R_PCR_SC2_Amplicon_5  | TACCTATTGGCAAATCTACCAAT       |
| R_PCR_SC2_Amplicon_6  | CACCTAACTGACTATGACTAAAA       |
| R_PCR_SC2_Amplicon_7  | CTCTGGAAAAATCTGTATTATTAGG     |
| R_PCR_SC2_Amplicon_8  | CATTATCGCTACCAACACATGTA       |
| R_PCR_SC2_Amplicon_9  | GTAAGTGCAGCTACTGAAAAGCA       |
| R_PCR_SC2_Amplicon_10 | CAGTTTGTGTAGTACCGGCA          |
| R_PCR_SC2_Amplicon_11 | CTAAAACGGCAATTCCAGTT          |
| R_PCR_SC2_Amplicon_12 | CCAAGTGCCTAAACTCTAGG          |
| R_PCR_SC2_Amplicon_13 | TTAGACATTAACACCTAAAGC         |
| R_PCR_SC2_Amplicon_14 | ACATAAAATGTTTTACCTTCATG       |
| R_PCR_SC2_Amplicon_15 | TGTTGACTATCATCATCTAACCA       |
| R_PCR_SC2_Amplicon_16 | AGTCAAATTCTCAGTGCCACAA        |
| F_PCR_SC2_Amplicon_1  | GTCACGCCTAAACGAACATG          |
| F_PCR_SC2_Amplicon_2  | TCTGGAGTAAAAGACTGTGTTGT       |
| F_PCR_SC2_Amplicon_3  | GTGATTGCCTTGGTGATATT          |
| F_PCR_SC2_Amplicon_4  | TATATTCTAAGCACACGCCTATT       |
| F_PCR_SC2_Amplicon_5  | TTAGAATTAGCTATGGATGAATT       |
| F_PCR_SC2_Amplicon_6  | ACAGCTAGGTTTTTCTACAGGTG       |
| F_PCR_SC2_Amplicon_7  | TTATTGTAATCACATAAACAC         |
| F_PCR_SC2_Amplicon_8  | TAAGGAATTACTTGTGTATGCTG       |
| F_PCR_SC2_Amplicon_9  | TGTAACAGCTTTAAGGGCCAATT       |
| F_PCR_SC2_Amplicon_10 | TGTGGCTATGAAGTACAATTATG       |
| F_PCR_SC2_Amplicon_11 | AAGAGAAGTGGGTTTTGTCG          |
| F_PCR_SC2_Amplicon_12 | ATAAATATTATAATTTGGTTTTACTATTA |
| F_PCR_SC2_Amplicon_13 | TATGGACAACAGTTTGGTCCAAC       |
| F_PCR_SC2_Amplicon_14 | GATTACCAAGGTAAACCTTTGGA       |
| F_PCR_SC2_Amplicon_15 | CTCATGAAGTGTGATCATTGTGG       |
| F_PCR_SC2_Amplicon_16 | ATTAAAGGTTTATACCTTCCCAG       |
